# Supplementary material
Source: PubMed Central journal article supplement (PMC8063131)
Supplement: jamainternmed-e212114-s001.pdf [file jamainternmed-e212114-s001.pdf]

## Supplemental Online Content

Mack CD, DiFiori J, Tai CG, et al. SARS-CoV-2 transmission risk among National Basketball Association players, staff, and vendors exposed to individuals with positive test results after COVID-19 recovery during the 2020 regular and postseason. *JAMA Intern Med*. Published online April 22, 2021. doi:10.1001/jamainternmed.2021.2114

**eTable.** Longitudinal Ct values of RT-PCR tests from the Roche cobas platform among individuals persistently testing positive after infection with SARS-CoV-2

This supplemental material has been provided by the authors to give readers additional information about their work.

**eTable. Longitudinal Ct values of RT-PCR Tests from the Roche Cobas Platform among Individuals Persistently Testing Positive After Infection with SARS-Cov-2**

| Case Number | Days since Start of Initial Infection | Days From First Persistent Positive PCR Test in Orlando | Target 1 Ct value | Target 2 Ct value |
|-------------|---------------------------------------|---------------------------------------------------------|-------------------|-------------------|
| 1           | N/A                                   | 0                                                       | 33.19             | 35.18             |
|             | N/A                                   | 1                                                       | 34.47             | 36.19             |
|             | N/A                                   | 2                                                       | 36.43             | Not Detected      |
|             | N/A                                   | 7                                                       | Not Detected      | 37.74             |
|             | N/A                                   | 8                                                       | 35.78             | 36.86             |
|             | N/A                                   | 11                                                      | 34.76             | Not Detected      |
|             | N/A                                   | 13                                                      | 34.90             | 37.72             |
| 2           | 27                                    | 1                                                       | 34.51             | 36.61             |
|             | 34                                    | 8                                                       | 36.11             | Not Detected      |
|             | 52                                    | 26                                                      | 35.29             | Not Detected      |
| 3           | 19                                    | 0                                                       | Not Detected      | 36.68             |
|             | 20                                    | 1                                                       | Not Detected      | 38.73             |
|             | 25                                    | 6                                                       | Not Detected      | 38.09             |
|             | 28                                    | 9                                                       | 35.40             | Not Detected      |
|             | 31                                    | 12                                                      | Not Detected      | 37.78             |
|             | 32                                    | 13                                                      | 36.52             | Not Detected      |
| 4           | 36                                    | 0                                                       | 36.32             | Not Detected      |
| 5           | 35                                    | 0                                                       | Not Detected      | 37.74             |
|             | 36                                    | 1                                                       | 34.71             | Not Detected      |
|             | 37                                    | 2                                                       | Not Detected      | 38.28             |
|             | 38                                    | 3                                                       | 34.66             | 37.84             |
|             | 40                                    | 5                                                       | 33.15             | 34.74             |
|             | 43                                    | 8                                                       | 35.52             | 36.70             |
| 6           | 21                                    | 0                                                       | Not Detected      | 37.69             |
|             | 28                                    | 7                                                       | 36.32             | Not Detected      |
|             | 31                                    | 10                                                      | 36.38             | Not Detected      |
| 7           | N/A                                   | 0                                                       | 36.42             | 38.20             |
| 8           | 27                                    | 0                                                       | 34.87             | 38.69             |
|             | 28                                    | 1                                                       | 34.26             | Not Detected      |
|             | 30                                    | 3                                                       | 34.35             | 36.85             |
|             | 32                                    | 5                                                       | Not Detected      | 37.67             |
|             | 35                                    | 8                                                       | Not Detected      | 38.14             |
|             | 36                                    | 9                                                       | 32.59             | 35.26             |
|             | 38                                    | 11                                                      | 32.12             | 33.23             |
| 9           | 16                                    | 0                                                       | 33.77             | 36.83             |

|    |    |    |              |              |
|----|----|----|--------------|--------------|
|    | 17 | 1  | Not Detected | 36.20        |
|    | 18 | 2  | 31.77        | 35.27        |
|    | 19 | 3  | Not Detected | 35.50        |
|    | 21 | 5  | Not Detected | 36.84        |
|    | 22 | 6  | Not Detected | 37.69        |
|    | 24 | 8  | Not Detected | 38.20        |
|    | 34 | 18 | 36.33        | Not Detected |
| 10 | 15 | 0  | Not Detected | 38.37        |
|    | 23 | 8  | Not Detected | 37.61        |
| 11 | 16 | 2  | 36.73        | 36.60        |
|    | 21 | 7  | 34.81        | 36.69        |
| 12 | 27 | 0  | Not Detected | 37.52        |
|    | 35 | 8  | Not Detected | 37.19        |
| 13 | 68 | 0  | Not Detected | 37.60        |
| 14 | 16 | 0  | 34.53        | 36.29        |
|    | 22 | 6  | Not Detected | 36.25        |
|    | 34 | 18 | Not Detected | 37.65        |
|    | 36 | 20 | Not Detected | 37.91        |
| 15 | 17 | 0  | 31.37        | 34.42        |
|    | 18 | 1  | Not Detected | 38.83        |
|    | 21 | 4  | Not Detected | 38.09        |
|    | 22 | 5  | Not Detected | 37.03        |
| 16 | 24 | 0  | Not Detected | 37.73        |
|    | 25 | 1  | 31.01        | 32.80        |
| 17 | 20 | 0  | Not Detected | 37.47        |
|    | 21 | 1  | 32.11        | 34.63        |
|    | 22 | 2  | Not Detected | 38.75        |
| 18 | 26 | 0  | 33.06        | 35.45        |
| 19 | 26 | 0  | Not Detected | 37.84        |
| 20 | 23 | 0  | 30.27        | 32.22        |
|    | 25 | 2  | Not Detected | 36.40        |
|    | 28 | 5  | 32.23        | 34.33        |
|    | 29 | 6  | 31.18        | 33.84        |
|    | 30 | 7  | 31.90        | 34.09        |
| 21 | 15 | 0  | Not Detected | 38.48        |
|    | 17 | 2  | Not Detected | 37.03        |
| 22 | 27 | 0  | Not Detected | 36.22        |
| 23 | 33 | 0  | Not Detected | 37.77        |
|    | 34 | 1  | 33.52        | 35.89        |
|    | 36 | 3  | 35.30        | Not Detected |
|    | 41 | 8  | Not Detected | 37.74        |

|    |     |    |              |       |
|----|-----|----|--------------|-------|
| 24 | 23  | 0  | Not Detected | 37.46 |
|    | 40  | 17 | Not Detected | 37.56 |
| 26 | 11  | 0  | 32.24        | 35.51 |
|    | 12  | 1  | 30.96        | 32.27 |
|    | 20  | 9  | Not Detected | 37.81 |
|    | 21  | 10 | 33.05        | 35.00 |
| 27 | 33  | 0  | Not Detected | 38.02 |
| 28 | N/A | 0  | 32.28        | 34.77 |
|    | N/A | 6  | Not Detected | 37.01 |
|    | N/A | 10 | 33.9         | 35.83 |
| 29 | 21  | 0  | 34.65        | 37.64 |
|    | 23  | 2  | Not Detected | 38.30 |
| 30 | N/A | 0  | 34.80        | 37.23 |
| 32 | 30  | 0  | Not Detected | 35.97 |
| 33 | 24  | 6  | Not Detected | 37.11 |
|    | 25  | 7  | Not Detected | 38.08 |
|    | 35  | 17 | 33.66        | 35.10 |
| 34 | 17  | 0  | 34.11        | 35.52 |
|    | 23  | 6  | 35.93        | 35.79 |
| 35 | 15  | 0  | 32.44        | 35.86 |
| 36 | 30  | 0  | Not Detected | 37.51 |

N/A: Not Available. The Roche cobas provides Ct values for both Target 1 (ORF1, detects SARS-CoV-2) and Target 2 (E gene, detects Sarbecovirus subgenus). If the cycle threshold reaches the maximum cycles without detection, a result of "Not Detected" for that target is returned. Persistent positive RT-PCR tests for case number 25 were from the Hologic platform and case number 31 had no positive RT-PCR tests while in Orlando; therefore, they are not in this table.
